# Supplementary material
Source: PubMed Central journal article supplement (PMC6576175)
Supplement: EMBJ-38-e101452-s005.pdf [file EMBJ-38-e101452-s005.pdf]

Figure 6e

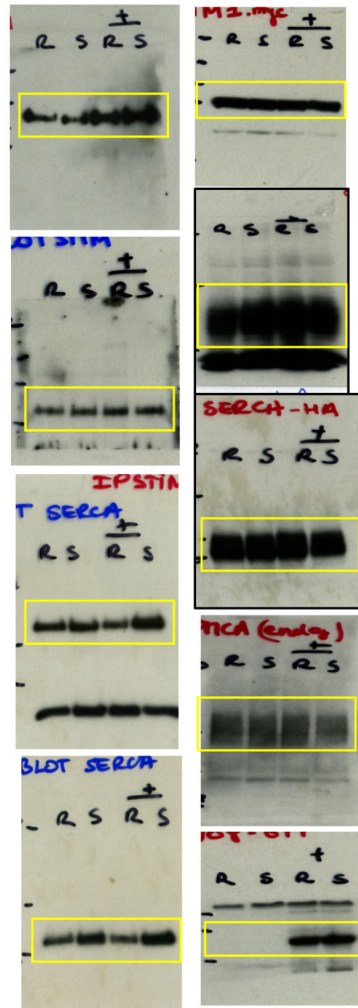

Figure 6f

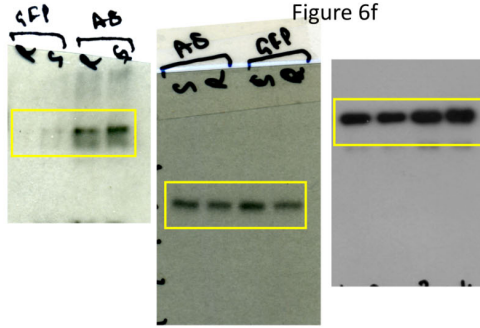

Figure 6j

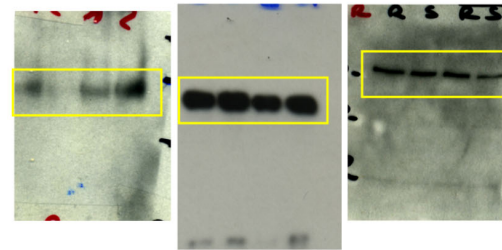

Source file data for Figure 6: Full blots for the indicated experiments and panels
