# Supplementary material
Source: PubMed Central journal article supplement (PMC6576175)

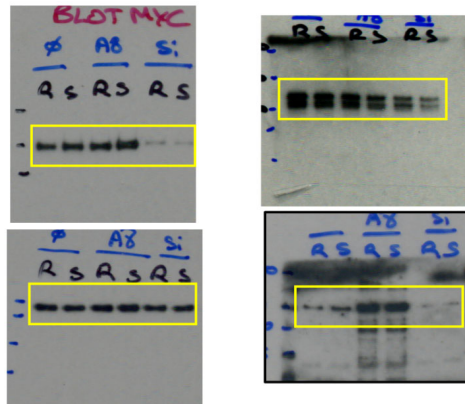

Source file data for Figure 1F: Full blots for the indicated experiments and panels

Supplement: EMBJ-38-e101452-s003.pdf [file EMBJ-38-e101452-s003.pdf]

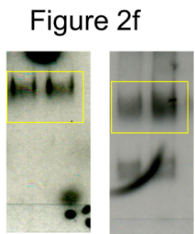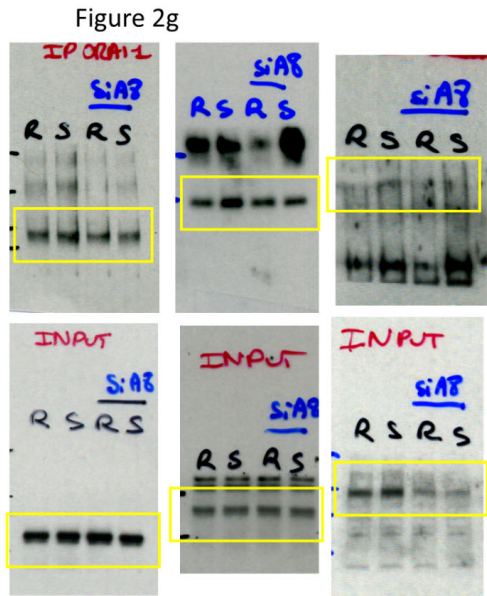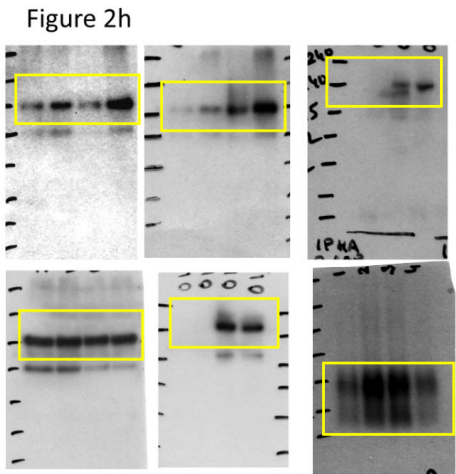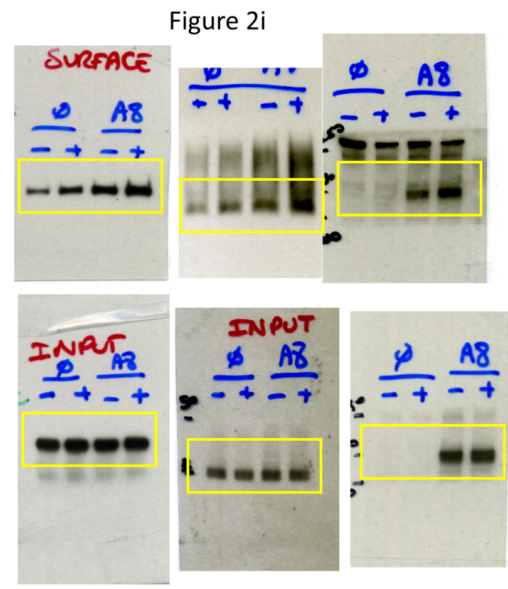

Source file data for Figure 2: Full blots for the indicated experiments and panels

Supplement: EMBJ-38-e101452-s004.pdf [file EMBJ-38-e101452-s004.pdf]
